# Supplementary material
Source: PubMed Central journal article supplement (PMC2921600)

**Figure E1**

**A** *Abcg1*<sup>+/+</sup> BM into *Abcg1*<sup>-/-</sup>    *Abcg1*<sup>-/-</sup> BM into *Abcg1*<sup>+/+</sup>

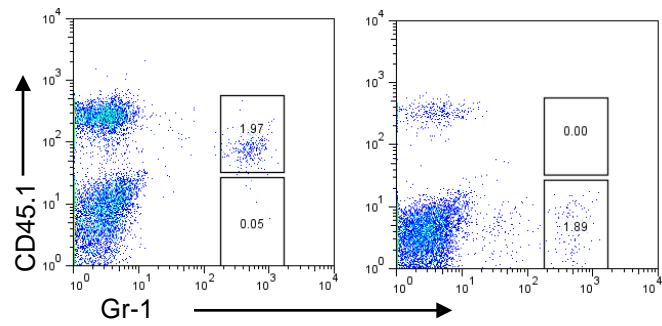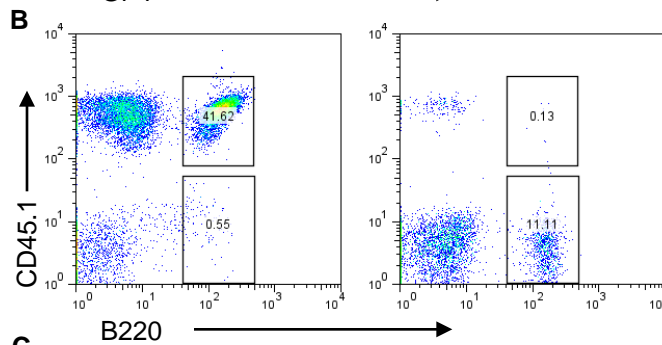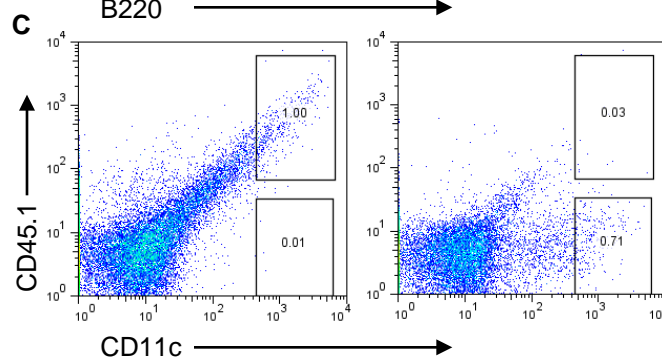

**Figure E2**

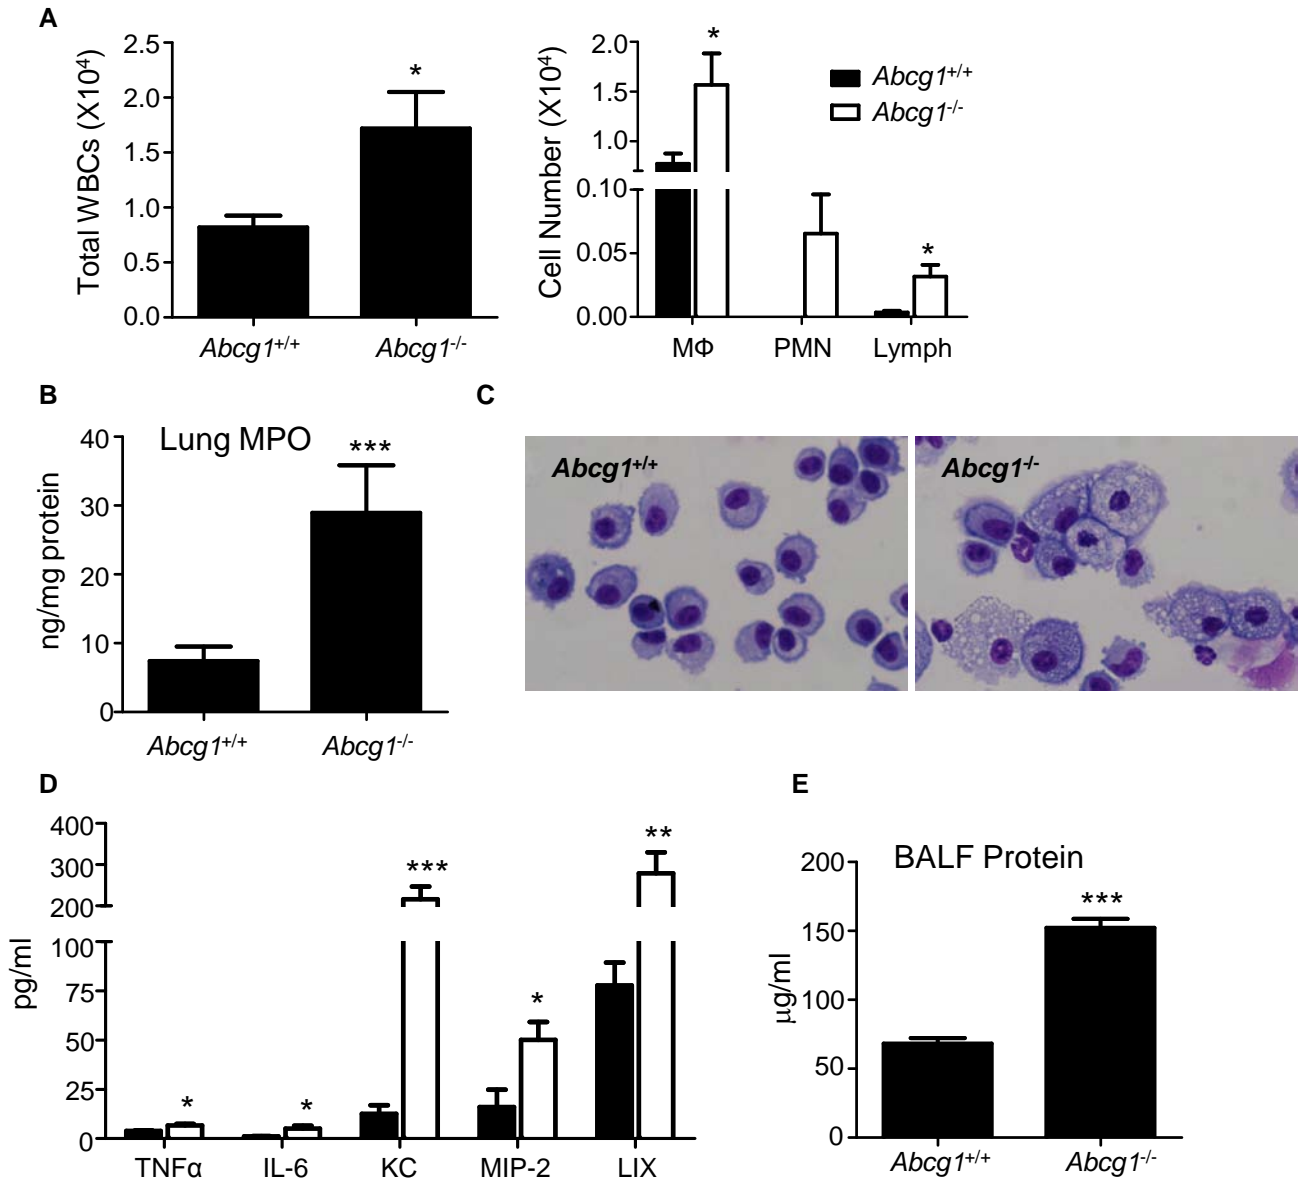

**Figure E3**

**A**

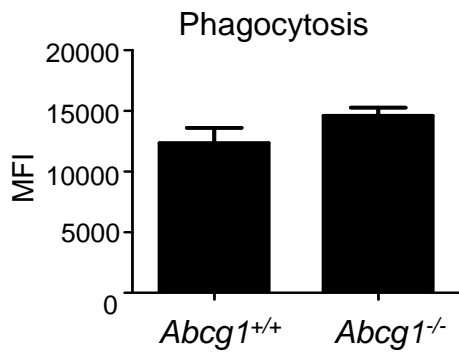

**B**

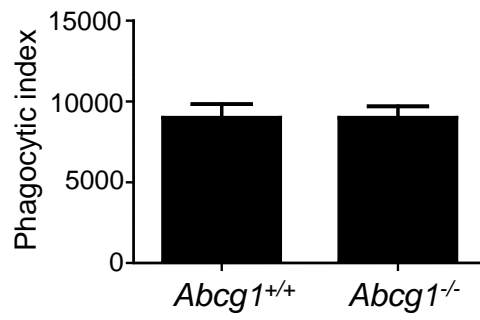

**Figure E4**

**A**

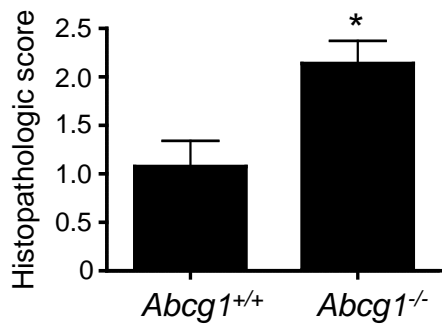

**B**

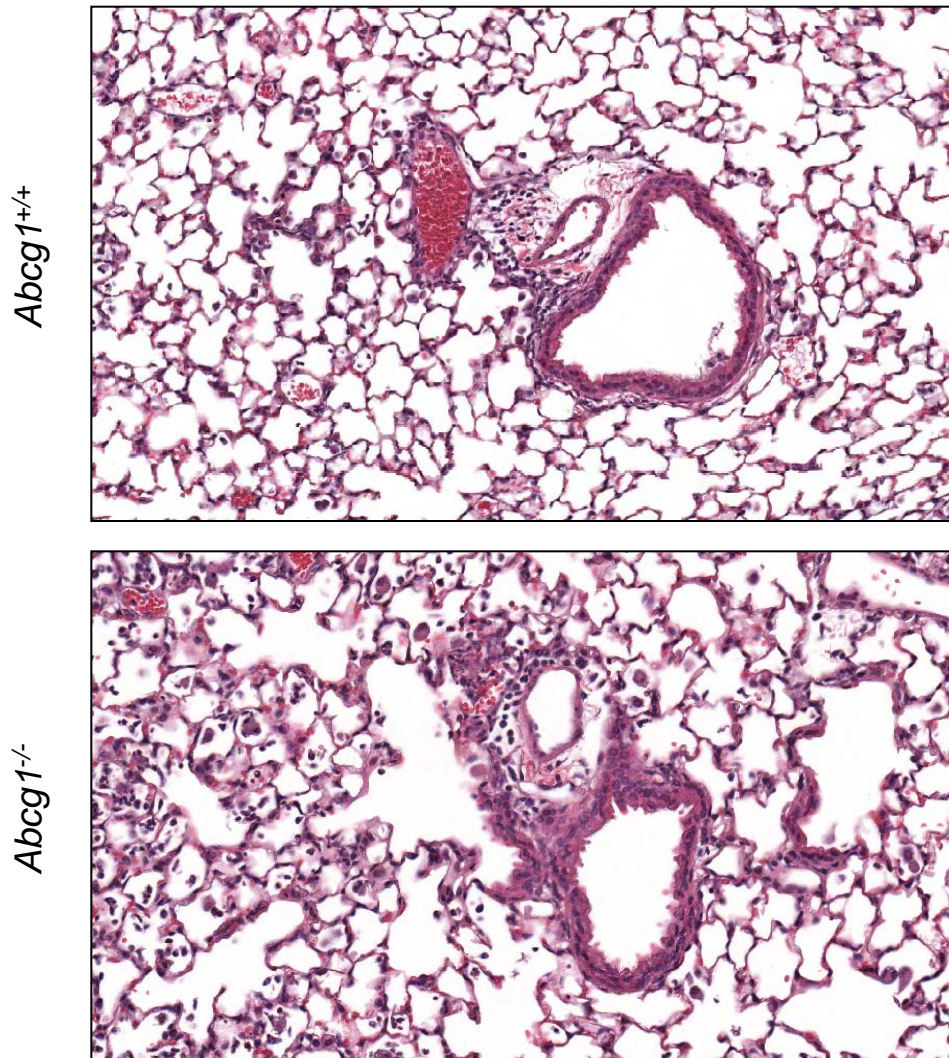

Supplement: supp_182_3_404__1.pdf [file supp_182_3_404__1.pdf]
